# Supplementary material for: Responses to membrane potential-modulating ionic solutions measured by magnetic resonance imaging of cultured cells and in vivo rat cortex
Source: eLife. 2025 Jul 3;13:RP101642. doi: 10.7554/eLife.101642 (PMC12226016; doi:10.7554/eLife.101642)
Supplement: Source data 1. [file elife-101642-data1.xlsx]

## Sheet: In vivo statistics
Rat	Condition	[K+]	T2	B1	NRMSE	Adjusted	Noise	Signal intensity
number		(mM)	(ms)			R2	level	at the last echo
1	Baseline	3	47.6	1.04	0.026	0.998	0.18	6.98
	Depolarization	40	48.3		0.025	0.999		7.05
	Depolarization	80	48.8		0.024	0.999		7.21
	Recovery	3	47.9		0.028	0.998		7.12
2	Baseline	3	50.2	0.88	0.023	0.999	0.15	7.7
	Depolarization	40	50.7		0.027	0.998		7.76
	Depolarization	80	51.3		0.027	0.998		7.86
	Recovery	3	50.5		0.032	0.997		7.96
3	Baseline	3	45.4	0.85	0.033	0.997	0.19	3.19
	Depolarization	40	46.4		0.028	0.998		3.27
	Depolarization	80	46.5		0.032	0.997		3.33
4	Baseline	3	42.9	0.79	0.019	0.999	0.16	5.47
	Depolarization	40	43		0.023	0.999		5.5
	Depolarization	80	43.4		0.018	0.999		5.6
5	Baseline	3	43.4	0.71	0.018	0.999	0.22	5.13
	Depolarization	40	43.7		0.02	0.999		5.33
	Depolarization	80	44		0.017	0.999		5.18
6	Baseline	3	55.1	0.78	0.037	0.995	0.35	6.32
	Depolarization	40	56.6		0.033	0.996		6.34
	Depolarization	80	56.9		0.033	0.996		6.9
7	Baseline	3	43.5	0.76	0.038	0.996	0.2	6.14
	Depolarization	40	44.2		0.041	0.995		6.25
	Depolarization	80	44.9		0.039	0.996		6.67

## Sheet: T2 (ms) in vitro
Pellet	[K+]						[Ba2+]
	(mM)						(mM)
	0.2	1	4.2	20	40	80	10
SH-SY5Y 1	46.77	47.26	48.53	52.68	54.57	58.86	52.35
SH-SY5Y 2	47.41	47.53	48.45	51.92	53.3	58.07	52.22
SH-SY5Y 3	46.19	47.12	49.76	54.45	56.24	60.59	54.98
SH-SY5Y 4	46.69	47.08	49.11	52.29	54.85	57.57	52.64
SH-SY5Y 5	49.04	49.01	51.64	54.16	55.38	63.76	56.53
SH-SY5Y 6	47.4	48.63	50.19	52.85	54.23	59.6	53.82
SH-SY5Y 7	45.54	46.45	48.85	52.07	55.26	57.75	51.42
SH-SY5Y 8	45.21	46.17	47.59	52.38	53.58	57.7	53.58
SH-SY5Y 9	48.69	48.08	50.88	53.7	56.18	61.24	56.24
SH-SY5Y 10	46.18	47.08	49.3	53.25	54.64	59.63	55.49
SH-SY5Y 11	47.62	47.66	49.36	53.3	54.64	59.95	56.18
SH-SY5Y 12	52.01	51.63	52.12	56.63	57	64.85	55.63
SH-SY5Y 13	50.85	51.62	54.23	58.63	60.68	62.59	55.39
SH-SY5Y 14	50.51	52.47	52.69	54.45	57.11	62.21	55.06
SH-SY5Y 15	50.66	50.14	51.25	52.43	54.45	60.42	51.38
Jurkat 1	43.51	43.86	53.41	64.77	66.5	69.33	63.59
Jurkat 2	41.37	38.5	54.33	62.48	63.46	63.9	59.46
Jurkat 3	43.35	40.81	54.78	64.25	65.28	65.78	63.56
Jurkat 4	48.08	44.82	55.59	59.94	61.97	61.19	59.64
Jurkat 5	48.39	44.09	56.28	61.08	60.21	60.45	59.63

## Sheet: PSR in vitro
Pellet	[K+]						[Ba2+]
	(mM)						(mM)
	0.2	1	4.2	20	40	80	10
SH-SY5Y 1	0.0395	0.0413	0.0388	0.0359	0.0366	0.0335	0.0347
SH-SY5Y 2	0.0408	0.04	0.0365	0.0363	0.0345	0.0324	0.0367
SH-SY5Y 3	0.0421	0.0382	0.0379	0.035	0.0345	0.0311	0.0364
SH-SY5Y 4	0.0401	0.0385	0.0382	0.0344	0.0362	0.0337	0.0358
SH-SY5Y 5	0.0359	0.0372	0.0361	0.0355	0.0342	0.0301	0.0307
SH-SY5Y 6	0.0416	0.0381	0.0366	0.0345	0.0323	0.031	0.0324
SH-SY5Y 7	0.0387	0.041	0.034	0.0347	0.0275	0.0328	0.034
SH-SY5Y 8	0.0415	0.0412	0.0385	0.035	0.0346	0.0335	0.0357
SH-SY5Y 9	0.0448	0.0457	0.0432	0.041	0.0393	0.0381	0.0384
SH-SY5Y 10	0.0443	0.042	0.0405	0.0394	0.036	0.0365	0.0354
SH-SY5Y 11	0.041	0.0418	0.0405	0.0369	0.035	0.0337	0.0353
SH-SY5Y 12	0.0337	0.0324	0.0308	0.0308	0.028	0.0292	0.0293
SH-SY5Y 13	0.0355	0.0362	0.0316	0.0322	0.03	0.0281	0.0309
SH-SY5Y 14	0.0341	0.033	0.0374	0.0328	0.0306	0.0299	0.0298
SH-SY5Y 15	0.0334	0.0354	0.0319	0.0336	0.0306	0.0272	0.0323
Jurkat 1	0.0197	0.0152	0.0144	0.0145	0.0126	0.0116	0.0106
Jurkat 2	0.0211	0.0225	0.0179	0.0131	0.013	0.0125	0.0148
Jurkat 3	0.0177	0.0187	0.0162	0.0124	0.0106	0.011	0.0127
Jurkat 4	0.0181	0.0155	0.0153	0.0143	0.0125	0.0124	0.0146
Jurkat 5	0.0168	0.0174	0.0156	0.0122	0.0159	0.0146	0.016

## Sheet: kmf (Hz) in vitro
Pellet	[K+]						[Ba2+]
	(mM)						(mM)
	0.2	1	4.2	20	40	80	10
SH-SY5Y 1	14.5	14.67	14.18	15.07	13.04	16.43	14.12
SH-SY5Y 2	14.77	14.26	14.08	15.81	15.46	15.21	13.21
SH-SY5Y 3	12.68	15.81	16.18	15.82	15.35	16.03	12.99
SH-SY5Y 4	12.74	13.98	13.15	14.53	12.79	14.42	13.45
SH-SY5Y 5	16.84	15.16	14.15	14.39	14.48	15.03	13.37
SH-SY5Y 6	14.49	15.88	14.51	17.72	16	17.49	17.15
SH-SY5Y 7	14.7	13.91	16.02	13.6	14.28	12.47	10.64
SH-SY5Y 8	13.69	14.78	16.92	15.71	15.21	15.12	12.83
SH-SY5Y 9	17.81	19.15	15.19	17.07	18.96	17.54	19.38
SH-SY5Y 10	16.13	18.19	15.66	16.88	15.94	15.87	17.01
SH-SY5Y 11	15.91	15.92	15.91	15.8	15.02	16.21	14.82
SH-SY5Y 12	12.15	13.18	13.35	9.86	12.77	9.44	11.01
SH-SY5Y 13	13.07	11.82	15.38	15.78	15.16	13.57	13.67
SH-SY5Y 14	13.83	13.57	10.77	12.11	16.33	14.23	13.71
SH-SY5Y 15	16.1	12.34	17.16	12.72	15.9	16.21	12.77
Jurkat 1	21.17	11.31	13.39	19.54	11.36	12.35	20.15
Jurkat 2	17.15	10.66	16.63	19.98	20.45	11.63	25.89
Jurkat 3	12.78	15.25	17.29	15.79	24.83	25.39	25
Jurkat 4	11.97	6.09	19.72	16.69	15.22	18.92	20.72
Jurkat 5	18.52	25.26	15.25	14.25	10.98	19.62	15.97

## Sheet: T1 (ms) in vitro
Pellet	[K+]						[Ba2+]
	(mM)						(mM)
	0.2	1	4.2	20	40	80	10
SH-SY5Y 1	1865	1888	1896	1949	1956	2006	1949
SH-SY5Y 2	1883	1915	1922	1956	1960	2000	1964
SH-SY5Y 3	1872	1923	1949	2003	2014	2049	2011
SH-SY5Y 4	1925	1932	1959	2003	2013	2044	1993
SH-SY5Y 5	1965	1938	1973	2011	2024	2104	2067
SH-SY5Y 6	1908	1934	1978	2001	2022	2084	2030
SH-SY5Y 7	1883	1877	1940	1985	2069	2038	1992
SH-SY5Y 8	1855	1890	1914	1970	1987	2030	1990
SH-SY5Y 9	1811	1795	1844	1874	1898	1953	1892
SH-SY5Y 10	1840	1855	1886	1932	1966	1996	1990
SH-SY5Y 11	1876	1876	1915	1943	1967	2017	2007
SH-SY5Y 12	1996	2039	2041	2057	2056	2116	2073
SH-SY5Y 13	1963	1966	2003	2044	2043	2083	2068
SH-SY5Y 14	2024	2038	2041	2073	2081	2136	2111
SH-SY5Y 15	2021	2026	2030	2060	2078	2133	2089
Jurkat 1	1866	1918	1983	2069	2079	2097	2049
Jurkat 2	1853	1872	2003	2073	2078	2090	2040
Jurkat 3	1845	1833	1972	2043	2044	2055	2046
Jurkat 4	1957	2055	1999	2055	2058	2049	2052
Jurkat 5	1948	1911	2011	2063	2075	2066	2079
